# Supplementary material
Source: HighWire-hosted journal article supplement (https://jpet.aspetjournals.org/highwire/filestream/136537/field_highwire_adjunct_files/0/jpet215970_suppl_data.docx)
Supplement: jpet215970_suppl_data.docx [file jpet215970_suppl_data.docx]

**Quantitative prediction of transporter- and enzyme-mediated clinical drug-drug interactions of OATP1B1 substrates using a mechanistic net-effect model**

Manthena V. Varma, Yi-an Bi, Emi Kimoto and Jian Lin

Pharmacokinetics Dynamics and Metabolism, Pfizer Global Research and Development, Pfizer Inc., Groton, CT 06340.

**Running title:** Mechanistic net-effect model for DDI predictions

**Corresponding Author:** Manthena V. Varma, Pharmacokinetics, Dynamics, and Metabolism, MS 8220-2451, Pfizer Global Research and Development, Pfizer Inc., Groton, CT 06340; Phone:+1-860-715-0257. Fax: +1-860-441-6402. E-mail: [manthena.v.varma@pfizer.com](mailto:manthena.v.varma@pfizer.com)


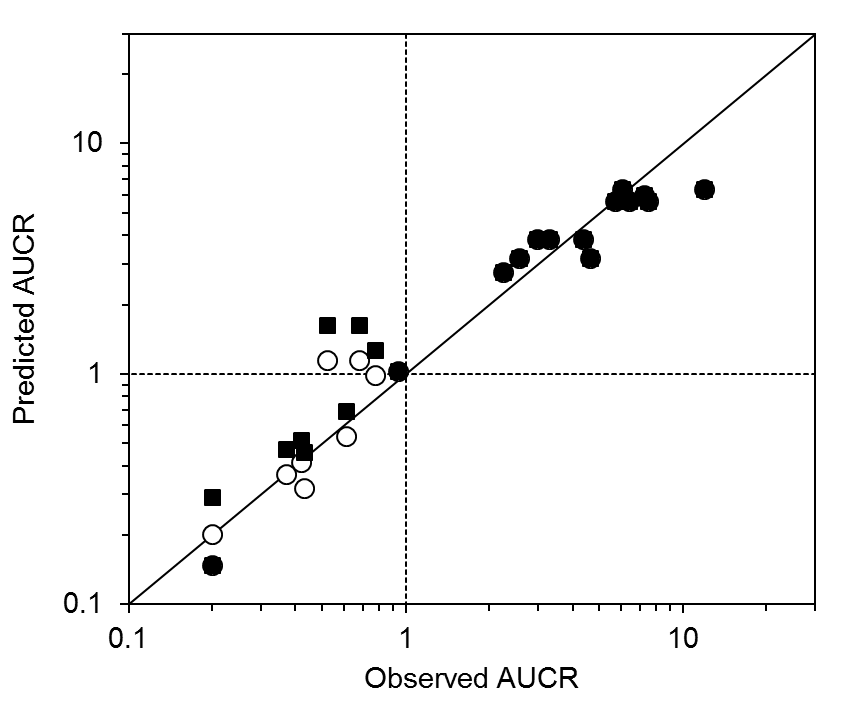


Supplementary Figure S1. Sensitivity analysis of the effect of empirical calibration factor for the *in vitro-in vivo* induction scaling (d-value, Eq. 9) on the model predictions of rifampicin based interactions. Closed squares and open circles represent predictions with d-value of 0.5 and 1, respectively.

Supplementary Figure S2. A proposed strategy for model-based predictions of transporter- and complex-DDIs associated with transporter-enzyme interplay. aDifferent cut-off may be considered for the significance of R-value based on the therapeutic index of the victim drug. bCut-off values for CYP interactions are given as suggested in the US FDA draft guidelines.(USFDA, 2012) cComplete mathematical expressions of the extended net-effect model is given in the Methods section.

Table S1. Summary of victim-cyclosporine DDI predictions using extended net-effect model.

| Victim drug | Cyclosporine dose (mg) | Iu,max,in (μM) | Iu,gut (μM) | R-value | Fh` .(CLh-CLr)/ Fh .(CLh`-CLr`) | Fg`/Fg | Kpuu`/Kpuu | Predicted AUCR† | Observed AUCR | Supplementary References |
| --- | --- | --- | --- | --- | --- | --- | --- | --- | --- | --- |
| Atorvastatin | 365 | 0.21 | 26.3 | 15.7 | 12.6 | 1.2 | 0.09 | 15.6 | 8.7 | (Hermann et al., 2004) |
| Atorvastatin | 175 | 0.10 | 12.6 | 8.1 | 7.3 | 1.1 | 0.15 | 8.3 | 15.3 | (Lemahieu et al., 2005) |
| Atorvastatin | 180 | 0.10 | 13.0 | 8.3 | 7.4 | 1.1 | 0.14 | 8.5 | 7.5 | (Asberg et al., 2001) |
| Bosantan | 300 | 0.17 | 21.6 | 13.1 | 4.0 | 1.0 | 0.27 | 4.0 | 3.7 | (Binet et al., 2000) |
| Cerivastatin | 200 | 0.11 | 14.4 | 9.1 | 5.8 | 1.1 | 0.18 | 6.3 | 3.8 | (Muck et al., 1999) |
| Cerivastatin | 200 | 0.11 | 14.4 | 9.1 | 5.8 | 1.1 | 0.18 | 6.3 | 4.8 | (Muck et al., 1999) |
| Fluvastatin | 100 | 0.06 | 7.2 | 5.0 | 5.2 | 1.0 | 0.20 | 5.2 | 3.6 | (Park et al., 2001) |
| Pitavastatin | 131 | 0.07 | 9.4 | 6.3 | 5.6 | 1.0 | 0.18 | 5.6 | 4.6 | (Hasunuma et al., 2003) |
| Pravastatin | 250 | 0.14 | 18.0 | 11.1 | 3.9 | 1.0 | 0.10 | 3.9 | 11.8 | (Park et al., 2002) |
| Pravastatin | 200 | 0.11 | 14.4 | 9.1 | 3.6 | 1.0 | 0.12 | 3.6 | 9.9 | (Hedman et al., 2004) |
| Rosuvastatin | 200 | 0.11 | 14.4 | 9.1 | 4.6 | 1.0 | 0.12 | 4.6 | 7.1 | (Simonson et al., 2004) |
| Repaglinide | 100 | 0.06 | 7.2 | 5.0 | 4.6 | 1.0 | 0.23 | 4.6 | 2.4 | (Kajosaari et al., 2005b) |

†after correcting in vitro CLint,h with drug-specific scaling factor.

Table S2. Summary of victim-gemfibrozil DDI predictions using extended net-effect model.

| Victim drug | Gemfibrozil dose (mg) | Iu,max,in (μM) Gemfibrozil | Cu,max (μM) Gem-glu | R-value | Fh` .(CLh-CLr)/ Fh .(CLh`-CLr`) | Fg`/Fg | Kpuu`/  Kpuu | Predicted AUCR | Observed AUCR | Supplementary References |
| --- | --- | --- | --- | --- | --- | --- | --- | --- | --- | --- |
| Repaglinide | 30 | 0.3 | 0.3 | 1.2 | 2.0 | 1.0 | 1.66 | 2.0 | 1.8 | (Honkalammi et al., 2011a) |
| Repaglinide | 100 | 1.0 | 1.1 | 1.5 | 2.7 | 1.0 | 1.31 | 2.7 | 4.5 | (Honkalammi et al., 2011a) |
| Repaglinide | 300 | 3.0 | 3.2 | 2.6 | 4.5 | 1.0 | 0.81 | 4.5 | 6.7 | (Honkalammi et al., 2011a) |
| Repaglinide | 600 | 6.1 | 6.3 | 4.2 | 7.0 | 1.0 | 0.53 | 7.0 | 6.3 | (Honkalammi et al., 2011b) |
| Repaglinide | 900 | 9.1 | 9.5 | 5.8 | 9.3 | 1.0 | 0.40 | 9.3 | 8.3 | (Honkalammi et al., 2011a) |
| Repaglinide | 30 | 0.3 | 0.3 | 1.2 | 2.0 | 1.0 | 1.66 | 2.0 | 3.4 | (Honkalammi et al., 2012) |
| Repaglinide | 100 | 1.0 | 1.1 | 1.5 | 2.7 | 1.0 | 1.31 | 2.7 | 5.5 | (Honkalammi et al., 2012) |
| Repaglinide | 600 | 6.1 | 6.3 | 4.2 | 7.0 | 1.0 | 0.53 | 7.0 | 7.0 | (Honkalammi et al., 2012) |
| Repaglinide | 600 | 6.1 | 6.3 | 4.2 | 7.0 | 1.0 | 0.53 | 7.0 | 7.4 | (Kalliokoski et al., 2008) |
| Repaglinide | 600 | 6.1 | 6.3 | 4.2 | 7.0 | 1.0 | 0.53 | 7.0 | 8.1 | (Niemi et al., 2003) |
| Repaglinide | 600 (+itraconazole 100mg) | 6.1 | 6.3 | 4.2 | 26.9 | 1.0 | 0.80 | 26.9 | 19.3 | (Niemi et al., 2003) |
| Atorvastatin | 600 | 6.1 | 6.3 | 4.2 | 4.0 | 1.0 | 0.25 | 4.0 | 1.4 | (Backman et al., 2005) |
| Cerivastatin | 600 | 6.1 | 6.3 | 4.2 | 5.8 | 1.0 | 0.39 | 5.8 | 5.6 | (Backman et al., 2002) |
| Pravastatin | 600 | 6.1 | 6.3 | 4.2 | 2.7 | 1.0 | 0.25 | 2.9 | 2.0 | (Kyrklund et al., 2003) |
| Rosuvastatin | 600 | 6.1 | 6.3 | 4.2 | 3.0 | 1.0 | 0.25 | 3.1 | 1.9 | (Schneck et al., 2004) |

†after correcting in vitro CLint,h with drug-specific scaling factor.

Table S3. Summary of victim-rifampicin DDI predictions using extended net-effect model.

| Victim drug | Rifampicin dose (mg) | Condition  (inh /ind)* | Iu,max,in (μM) | Iu,gut (μM) | R-value | Fh` .(CLh-CLr)/ Fh .(CLh`-CLr`) | Fg`/Fg | Kpu`/ Kpu | Predicted AUCR† | Observed AUCR | Supplementary References |
| --- | --- | --- | --- | --- | --- | --- | --- | --- | --- | --- | --- |
| Repaglinide | 600 MD | inh+ind | 2.6 | 3.7 | 6.2 | 3.8 | 0.30 | 0.02 | 1.14 | 0.52 | (Bidstrup et al., 2004) |
| Repaglinide | 600 MD | inh+ind | 2.6 | 3.7 | 6.2 | 3.8 | 0.30 | 0.02 | 1.14 | 0.68 | (Hatorp et al., 2003) |
| Repaglinide | 600 MD | inh+ind | 0.4 | 0.0 | 1.7 | 1.2 | 0.26 | 0.06 | 0.32 | 0.43 | (Niemi et al., 2000) |
| Repaglinide | 600 MD | ind only | 0.0 | 0.0 | 1.1 | 0.8 | 0.26 | 0.09 | 0.20 | 0.20 | (Bidstrup et al., 2004) |
| Atorvastatin | 600 SD | inh only | 2.6 | 3.7 | 6.2 | 5.9 | 1.07 | 0.19 | 6.34 | 6.07 | (He et al., 2009) |
| Atorvastatin | 600 SD | inh only | 2.6 | 3.7 | 6.2 | 5.9 | 1.07 | 0.19 | 6.34 | 12.00 | (Maeda et al., 2011) |
| Atorvastatin | 600 SD iv | inh only | 2.6 | 0.0 | 6.2 | 5.9 | 1.00 | 0.19 | 5.92 | 7.25 | (Lau et al., 2007) |
| Atorvastatin | 600 MD | inh+ind | 0.4 | 0.0 | 1.7 | 1.3 | 0.12 | 0.02 | 0.15 | 0.20 | (Backman et al., 2005) |
| Bosantan | 600 MD | inh+ind | 0.4 | 3.7 | 1.7 | 0.7 | 0.56 | 0.03 | 0.41 | 0.42 | (van Giersbergen et al., 2007) |
| Pravastatin | 600 SD | inh only | 2.6 | 3.7 | 6.2 | 3.2 | 1.00 | 0.17 | 3.18 | 2.57 | (Deng et al., 2009) |
| Pravastatin | 600 SD | inh only | 2.6 | 3.7 | 6.2 | 3.2 | 1.00 | 0.17 | 3.18 | 4.64 | (Maeda et al., 2011) |
| Pitavastatin | 600 SD | inh only | 2.6 | 3.7 | 6.2 | 5.6 | 1.00 | 0.18 | 5.59 | 6.40 | (Chen et al., 2013) |
| Pitavastatin | 600 SD iv | inh only | 2.6 | 0.0 | 6.2 | 5.6 | 1.00 | 0.18 | 5.59 | 7.50 | (Prueksaritanont et al., 2014) |
| Pitavastatin | 600 SD | inh only | 2.6 | 3.7 | 6.2 | 5.6 | 1.00 | 0.18 | 5.59 | 5.70 | (Prueksaritanont et al., 2014) |
| Rosuvastatin | 450 MD | ind only | 0.0 | 3.7 | 1.0 | 1.0 | 1.00 | 1.00 | 1.02 | 0.94 | (Zhang et al., 2008) |
| Rosuvastatin | 600 SD | inh only | 2.6 | 3.7 | 6.2 | 3.8 | 1.00 | 0.17 | 3.81 | 3.00 | (Shen et al., 2013) |
| Rosuvastatin | 600 SD iv | inh only | 2.6 | 0.0 | 6.2 | 3.8 | 1.00 | 0.17 | 3.81 | 3.30 | (Prueksaritanont et al., 2014) |
| Rosuvastatin | 600 SD | inh only | 2.6 | 3.7 | 6.2 | 3.8 | 1.00 | 0.17 | 3.81 | 4.37 | (Prueksaritanont et al., 2014) |
| Glyburide | 600 MD | inh+ind | 2.6 | 3.7 | 6.2 | 2.1 | 0.46 | 0.02 | 0.99 | 0.78 | (Zheng et al., 2009) |
| Glyburide | 600 MD | ind only | 0.0 | 3.7 | 1.0 | 0.8 | 0.46 | 0.05 | 0.37 | 0.37 | (Zheng et al., 2009) |
| Glyburide | 600 MD | inh+ind | 0.4 | 3.7 | 1.7 | 1.2 | 0.46 | 0.03 | 0.53 | 0.61 | (Niemi et al., 2001a) |
| Glyburide | 600 SD | Inh only | 2.6 | 0.0 | 6.2 | 2.8 | 1.00 | 0.39 | 2.76 | 2.25 | (Zheng et al., 2009) |

*Inhibition of OATP1B1 and/or induction of CYP3A4 were assumed based on the rifampicin dosage regimen. DDI studies involving single concomitant dosing of victim drug and rifampicin, only OATP1B1 inhibition by rifampicin was considered. In contrary, where victim drug was dosed within 12.5h after the last dose of rifampicin chronic pre-treatment (5- or 7-day), both OATP1B1 inhibition and CYP3A4 induction activity were assumed simultaneously; while when dosed after 12.5h only CYP3A4 induction was considered †after correcting in vitro CLint,h with drug-specific scaling factor. MD – multiple dose treatment. SD – single dose . †after correcting in vitro CLint,h with drug-specific scaling factor.

Table S4. Summary of victim-itraconazole/clarithromycin DDI predictions using extended net-effect model.

| Victim drug | Perpetrator Dose (mg) | Iu,max,in (μM) | 4-OH-Itra Cu,max (μM) | R-value | Fh` .(CLh-CLr)/ Fh .(CLh`-CLr`) | Fg`/Fg | Kpuu`/Kpuu | Predicted AUCR† | Observed AUCR | Supplementary References |
| --- | --- | --- | --- | --- | --- | --- | --- | --- | --- | --- |
| Itraconazole DDIs |  |  |  |  |  |  |  |  |  |  |
| Atorvastatin | 200 | 0.09 | 0.003 |  | 2.1 | 1.7 | 2.4 | 3.4 | 3.3 | (Kantola et al., 1998) |
| Atorvastatin | 200 | 0.09 | 0.003 |  | 2.1 | 1.7 | 2.4 | 3.4 | 2.5 | (Mazzu et al., 2000) |
| Cerivastatin | 200 | 0.09 | 0.003 |  | 1.5 | 1.3 | 1.2 | 2.0 | 1.3 | (Mazzu et al., 2000) |
| Fluvastatin | 100 | 0.04 | 0.002 |  | 1.3 | 1.0 | 1.2 | 1.3 | 1.3 | (Kivisto et al., 1998) |
| Pravastatin | 200 | 0.09 | 0.003 |  | 1.0 | 1.0 | 1.0 | 1.0 | 1.5 | (Mazzu et al., 2000) |
| Pravastatin | 200 | 0.09 | 0.003 |  | 1.0 | 1.0 | 1.0 | 1.0 | 1.7 | (Neuvonen et al., 1998) |
| Repaglinide | 100 | 0.04 | 0.002 |  | 1.2 | 1.1 | 1.2 | 1.2 | 1.4 | (Niemi et al., 2003) |
| Rosuvastatin | 200 | 0.09 | 0.003 |  | 1.0 | 1.0 | 1.0 | 1.0 | 1.4 | (Cooper et al., 2003) |
| Rosuvastatin | 200 | 0.09 | 0.003 |  | 1.0 | 1.0 | 1.0 | 1.0 | 1.3 | (Cooper et al., 2003) |
| Clarithromycin DDIs |  |  |  |  |  |  |  |  |  |  |
| Atorvastatin | 500 | 3.5 |  | 1.4 | 2.2 | 1.7 | 1.3 | 3.6 | 4.4 | (Jacobson, 2004) |
| Glyburide | 250 | 1.8 |  | 1.2 | 1.3 | 1.0 | 1.2 | 1.3 | 1.3 | (Lilja et al., 2007) |
| Pravastatin | 500 | 3.5 |  | 1.4 | 1.3 | 1.0 | 0.7 | 1.3 | 2.1 | (Jacobson, 2004) |
| Repaglinide | 250 | 1.8 |  | 1.2 | 1.3 | 1.1 | 1.0 | 1.4 | 1.4 | (Niemi et al., 2001b) |

†after correcting in vitro CLint,h with drug-specific scaling factor.

Table S5. References for the victim and perpetrator drug-related input parameters given in Table 1.

| Drugs | Supplementary References for input parameters |
| --- | --- |
| Atorvastatin | [CLiv - Pfizer Data on file] (Gibson et al., 1997) |
| Bosantan | (Weber et al., 1996; Weber et al., 1999; Obach et al., 2008) |
| Cerivastatin | (Muck et al., 1997; Obach et al., 2008; Varma et al., 2010) |
| Fluvastatin | (Tse et al., 1993; Lindahl et al., 1996) |
| Glyburide | (Rydberg et al., 1995; Jonsson et al., 2000; Obach et al., 2008; Varma et al., 2010; Varma et al., 2014) |
| Pitavastatin | (Yoshida et al., 2012) |
| Pravastatin | (Singhvi et al., 1990; Watanabe et al., 2009; Varma et al., 2012) |
| Rosuvastatin | (Crestor; Martin et al., 2003) |
| Repaglinide | (Hatorp et al., 1998; Plum et al., 2000; Kajosaari et al., 2005a; Varma et al., 2013a; Varma et al., 2013b) |
| Valsartan | (Flesch et al., 1997) |
| Cyclosporine | (Ptachcinski et al., 1985; Kurokawa et al., 1996; Tang et al., 2002; Bergman et al., 2006; Xia et al., 2007; Amundsen et al., 2010; Varma et al., 2010; Varma et al., 2012) |
| Gemfibrozil and Gemfibrozil-1-O-b-glucuronide | (Schneck et al., 2004; Ogilvie et al., 2006; Nakagomi-Hagihara et al., 2007; VandenBrink et al., 2011; Varma et al., 2012; Varma et al., 2013a) |
| Rifampicin | (Panchagnula et al., 2000; Varma et al., 2012; Varma et al., 2013b) |
| Clarithromycin | (Davey, 1991; Chu et al., 1992; Yago et al., 1996; Hirano et al., 2006; Watanabe et al., 2007) |
| Itraconazole and 4-OH-Itraconazole | (Heykants et al., 1989; Isoherranen et al., 2004; Varma et al., 2010) |
|  |  |

**Bioanalytical Procedure: LC-MS/MS methodology**

Analysis of 20µl samples was performed using high-performance liquid chromatography (Shimadzu DGU-14A membrane degasser, SCL-20A VP pump controller, LC-20AD VP pumps, and Sound Analytics ADDA autosampler) followed by tandem mass spectrometry (API 5500; MDS Sciex, Concord, ON, Canada) using a 2-min run time per sample. The mobile phase used to load the column (Kinetex C18 2.6u, 100A, 30x2mm) was 0.1% formic in water. Elution was performed at 0.7 min using a mobile phase of 0.1% formic acid in acetonitrile. The flow rate was set at 0.5 ml/min. The mass/charge ratio (m/z) and collision energies (electron volts) for each compound were as follows: atorvastatin m/z 559 440, 30eV; bosentan m/z 550 197, -45eV; cerivastatin m/z 460 356, 51eV; fluvastatin m/z 412  224, 45eV; pitavastatin m/z 442 290, 45eV; pravastatin m/z 423  101, -45eV; rosuvastatin m/z 482 258, 55eV; repaglinide m/z 453 230, 45eV; glyburide m/z 492 367, -20eV. The internal standard used in all analyses was tolbutamide in negative ion mode (m/z 269 > 170, -30eV) and carbamazapine in positive ion mode (m/z 237 > 194, 30eV).

**Derivation of Equation 2**

For OATP substrates, hepatic clearance is determined by permeability-limited disposition, which is defined by extended-clearance term.

where PSuptake and PSefflux are the uptake and efflux intrinsic clearances across the sinusoidal membrane. PSinflux,active, PSefflux,active and PSpd are sinusoidal active uptake, active efflux and passive diffusion intrinsic clearances, respectively. CLint,CYP and CLint,bile are metabolic and biliary intrinsic clearances. SFactive represents empirical scaling factor for active uptake estimated by matching the *in vitro* CLint,h to the *in vivo* CLint,h, obtained from clinical pharmacokinetics. The primarily assumption here is accurate in vitro-in vivo translation of CLint,CYP and CLint,bile determined experimentally using HLM and SCHH systems.

Assuming active efflux across sinusoidal membrane (PSefflux,active) is negligible, above equation can be rewritten as:

**Supplementary References**

Amundsen R, Christensen H, Zabihyan B and Asberg A (2010) Cyclosporine A, but not tacrolimus, shows relevant inhibition of organic anion-transporting protein 1B1-mediated transport of atorvastatin. *Drug Metab Dispos* **38**:1499-1504.

Asberg A, Hartmann A, Fjeldsa E, Bergan S and Holdaas H (2001) Bilateral pharmacokinetic interaction between cyclosporine A and atorvastatin in renal transplant recipients. *Am J Transplant* **1**:382-386.

Backman JT, Kyrklund C, Neuvonen M and Neuvonen PJ (2002) Gemfibrozil greatly increases plasma concentrations of cerivastatin. *Clin Pharmacol Ther* **72**:685-691.

Backman JT, Luurila H, Neuvonen M and Neuvonen PJ (2005) Rifampin markedly decreases and gemfibrozil increases the plasma concentrations of atorvastatin and its metabolites. *Clin Pharmacol Ther* **78**:154-167.

Bergman AJ, Burke J, Larson P, Johnson-Levonas AO, Reyderman L, Statkevich P, Kosoglou T, Greenberg HE, Kraft WK, Frick G, Murphy G, Gottesdiener K and Paolini JF (2006) Effects of ezetimibe on cyclosporine pharmacokinetics in healthy subjects. *J Clin Pharmacol* **46**:321-327.

Bidstrup TB, Stilling N, Damkier P, Scharling B, Thomsen MS and Brosen K (2004) Rifampicin seems to act as both an inducer and an inhibitor of the metabolism of repaglinide. *Eur J Clin Pharmacol* **60**:109-114.

Binet I, Wallnofer A, Weber C, Jones R and Thiel G (2000) Renal hemodynamics and pharmacokinetics of bosentan with and without cyclosporine A. *Kidney Int* **57**:224-231.

Chen Y, Zhang W, Huang WH, Tan ZR, Wang YC, Huang X and Zhou HH (2013) Effect of a single-dose rifampin on the pharmacokinetics of pitavastatin in healthy volunteers. *Eur J Clin Pharmacol*.

Chu SY, Deaton R and Cavanaugh J (1992) Absolute bioavailability of clarithromycin after oral administration in humans. *Antimicrob Agents Chemother* **36**:1147-1150.

Cooper KJ, Martin PD, Dane AL, Warwick MJ, Schneck DW and Cantarini MV (2003) Effect of itraconazole on the pharmacokinetics of rosuvastatin. *Clin Pharmacol Ther* **73**:322-329.

Crestor Product label.

Davey PG (1991) The pharmacokinetics of clarithromycin and its 14-OH metabolite. *J Hosp Infect* **19 Suppl A**:29-37.

Deng S, Chen XP, Cao D, Yin T, Dai ZY, Luo J, Tang L and Li YJ (2009) Effects of a concomitant single oral dose of rifampicin on the pharmacokinetics of pravastatin in a two-phase, randomized, single-blind, placebo-controlled, crossover study in healthy Chinese male subjects. *Clin Ther* **31**:1256-1263.

Flesch G, Müller P and Lloyd P (1997) Absolute bioavailability and pharmacokinetics of valsartan, an angiotensin II receptor antagonist, in man. *Eur J Clin Pharmacol* **52**:115-120.

Gibson DM, Stern RH and Abel RB (1997) Absolute bioavailability of atorvastatin in man. *Pharm Res* **14**:S253.

Hasunuma T, Nakamura M and Yachi T (2003) The Drug-drug Interactions of Pitavastatin (NK-104), a Novel HMG-CoA Reductase Inhibitor and Cyclosporine. *Journal of Clinical Therapeutics & Medicines* **19**:381-389.

Hatorp V, Hansen KT and Thomsen MS (2003) Influence of drugs interacting with CYP3A4 on the pharmacokinetics, pharmacodynamics, and safety of the prandial glucose regulator repaglinide. *J Clin Pharmacol* **43**:649-660.

Hatorp V, Oliver S and Su CA (1998) Bioavailability of repaglinide, a novel antidiabetic agent, administered orally in tablet or solution form or intravenously in healthy male volunteers. *Int J Clin Pharmacol Ther* **36**:636-641.

He YJ, Zhang W, Chen Y, Guo D, Tu JH, Xu LY, Tan ZR, Chen BL, Li Z, Zhou G, Yu BN, Kirchheiner J and Zhou HH (2009) Rifampicin alters atorvastatin plasma concentration on the basis of SLCO1B1 521T>C polymorphism. *Clin Chim Acta* **405**:49-52.

Hedman M, Neuvonen PJ, Neuvonen M, Holmberg C and Antikainen M (2004) Pharmacokinetics and pharmacodynamics of pravastatin in pediatric and adolescent cardiac transplant recipients on a regimen of triple immunosuppression. *Clin Pharmacol Ther* **75**:101-109.

Hermann M, Asberg A, Christensen H, Holdaas H, Hartmann A and Reubsaet JL (2004) Substantially elevated levels of atorvastatin and metabolites in cyclosporine-treated renal transplant recipients. *Clin Pharmacol Ther* **76**:388-391.

Heykants J, Van Peer A, Van de Velde V, Van Rooy P, Meuldermans W, Lavrijsen K, Woestenborghs R, Van Cutsem J and Cauwenbergh G (1989) The clinical pharmacokinetics of itraconazole: an overview. *Mycoses* **32 Suppl 1**:67-87.

Hirano M, Maeda K, Shitara Y and Sugiyama Y (2006) Drug-drug interaction between pitavastatin and various drugs via OATP1B1. *Drug Metab Dispos* **34**:1229-1236.

Honkalammi J, Niemi M, Neuvonen PJ and Backman JT (2011a) Dose-dependent interaction between gemfibrozil and repaglinide in humans: strong inhibition of CYP2C8 with subtherapeutic gemfibrozil doses. *Drug Metab Dispos* **39**:1977-1986.

Honkalammi J, Niemi M, Neuvonen PJ and Backman JT (2011b) Mechanism-based inactivation of CYP2C8 by gemfibrozil occurs rapidly in humans. *Clin Pharmacol Ther* **89**:579-586.

Honkalammi J, Niemi M, Neuvonen PJ and Backman JT (2012) Gemfibrozil is a strong inactivator of CYP2C8 in very small multiple doses. *Clin Pharmacol Ther* **91**:846-855.

Isoherranen N, Kunze KL, Allen KE, Nelson WL and Thummel KE (2004) Role of itraconazole metabolites in CYP3A4 inhibition. *Drug Metab Dispos* **32**:1121-1131.

Jacobson TA (2004) Comparative pharmacokinetic interaction profiles of pravastatin, simvastatin, and atorvastatin when coadministered with cytochrome P450 inhibitors. *Am J Cardiol* **94**:1140-1146.

Jonsson A, Chan JC, Rydberg T, Vaaler S, Hallengren B, Cockram CS, Critchley JA and Melander A (2000) Pharmacodynamics and pharmacokinetics of intravenous glibenclamide in Caucasian and Chinese patients with type-2 diabetes. *Eur J Clin Pharmacol* **55**:721-727.

Kajosaari LI, Laitila J, Neuvonen PJ and Backman JT (2005a) Metabolism of repaglinide by CYP2C8 and CYP3A4 in vitro: effect of fibrates and rifampicin. *Basic Clin Pharmacol Toxicol* **97**:249-256.

Kajosaari LI, Niemi M, Neuvonen M, Laitila J, Neuvonen PJ and Backman JT (2005b) Cyclosporine markedly raises the plasma concentrations of repaglinide. *Clin Pharmacol Ther* **78**:388-399.

Kalliokoski A, Backman JT, Kurkinen KJ, Neuvonen PJ and Niemi M (2008) Effects of gemfibrozil and atorvastatin on the pharmacokinetics of repaglinide in relation to SLCO1B1 polymorphism. *Clin Pharmacol Ther* **84**:488-496.

Kantola T, Kivisto KT and Neuvonen PJ (1998) Effect of itraconazole on the pharmacokinetics of atorvastatin. *Clin Pharmacol Ther* **64**:58-65.

Kivisto KT, Kantola T and Neuvonen PJ (1998) Different effects of itraconazole on the pharmacokinetics of fluvastatin and lovastatin. *Br J Clin Pharmacol* **46**:49-53.

Kurokawa N, Kadobayashi M, Yamamoto K, Arakawa Y, Sawada M, Takahara S, Okuyama A and Yanaihara C (1996) In-vivo distribution and erythrocyte binding characteristics of cyclosporin in renal transplant patients. *J Pharm Pharmacol* **48**:553-559.

Kyrklund C, Backman JT, Neuvonen M and Neuvonen PJ (2003) Gemfibrozil increases plasma pravastatin concentrations and reduces pravastatin renal clearance. *Clin Pharmacol Ther* **73**:538-544.

Lau YY, Huang Y, Frassetto L and Benet LZ (2007) Effect of OATP1B transporter inhibition on the pharmacokinetics of atorvastatin in healthy volunteers. *Clin Pharmacol Ther* **81**:194-204.

Lemahieu WP, Hermann M, Asberg A, Verbeke K, Holdaas H, Vanrenterghem Y and Maes BD (2005) Combined therapy with atorvastatin and calcineurin inhibitors: no interactions with tacrolimus. *Am J Transplant* **5**:2236-2243.

Lilja JJ, Niemi M, Fredrikson H and Neuvonen PJ (2007) Effects of clarithromycin and grapefruit juice on the pharmacokinetics of glibenclamide. *Br J Clin Pharmacol* **63**:732-740.

Lindahl A, Sandstrom R, Ungell AL, Abrahamsson B, Knutson TW, Knutson L and Lennernas H (1996) Jejunal permeability and hepatic extraction of fluvastatin in humans. *Clin Pharmacol Ther* **60**:493-503.

Maeda K, Ikeda Y, Fujita T, Yoshida K, Azuma Y, Haruyama Y, Yamane N, Kumagai Y and Sugiyama Y (2011) Identification of the rate-determining process in the hepatic clearance of atorvastatin in a clinical cassette microdosing study. *Clin Pharmacol Ther* **90**:575-581.

Martin PD, Warwick MJ, Dane AL, Brindley C and Short T (2003) Absolute oral bioavailability of rosuvastatin in healthy white adult male volunteers. *Clin Ther* **25**:2553-2563.

Mazzu AL, Lasseter KC, Shamblen EC, Agarwal V, Lettieri J and Sundaresen P (2000) Itraconazole alters the pharmacokinetics of atorvastatin to a greater extent than either cerivastatin or pravastatin. *Clin Pharmacol Ther* **68**:391-400.

Muck W, Mai I, Fritsche L, Ochmann K, Rohde G, Unger S, Johne A, Bauer S, Budde K, Roots I, Neumayer HH and Kuhlmann J (1999) Increase in cerivastatin systemic exposure after single and multiple dosing in cyclosporine-treated kidney transplant recipients. *Clin Pharmacol Ther* **65**:251-261.

Muck W, Ritter W, Ochmann K, Unger S, Ahr G, Wingender W and Kuhlmann J (1997) Absolute and relative bioavailability of the HMG-CoA reductase inhibitor cerivastatin. *Int J Clin Pharmacol Ther* **35**:255-260.

Nakagomi-Hagihara R, Nakai D, Tokui T, Abe T and Ikeda T (2007) Gemfibrozil and its glucuronide inhibit the hepatic uptake of pravastatin mediated by OATP1B1. *Xenobiotica* **37**:474-486.

Neuvonen PJ, Kantola T and Kivisto KT (1998) Simvastatin but not pravastatin is very susceptible to interaction with the CYP3A4 inhibitor itraconazole. *Clin Pharmacol Ther* **63**:332-341.

Niemi M, Backman JT, Neuvonen M and Neuvonen PJ (2003) Effects of gemfibrozil, itraconazole, and their combination on the pharmacokinetics and pharmacodynamics of repaglinide: potentially hazardous interaction between gemfibrozil and repaglinide. *Diabetologia* **46**:347-351.

Niemi M, Backman JT, Neuvonen M, Neuvonen PJ and Kivisto KT (2000) Rifampin decreases the plasma concentrations and effects of repaglinide. *Clin Pharmacol Ther* **68**:495-500.

Niemi M, Backman JT, Neuvonen M, Neuvonen PJ and Kivisto KT (2001a) Effects of rifampin on the pharmacokinetics and pharmacodynamics of glyburide and glipizide. *Clin Pharmacol Ther* **69**:400-406.

Niemi M, Neuvonen PJ and Kivisto KT (2001b) The cytochrome P4503A4 inhibitor clarithromycin increases the plasma concentrations and effects of repaglinide. *Clin Pharmacol Ther* **70**:58-65.

Obach RS, Lombardo F and Waters NJ (2008) Trend analysis of a database of intravenous pharmacokinetic parameters in humans for 670 drug compounds. *Drug Metab Dispos* **36**:1385-1405.

Ogilvie BW, Zhang D, Li W, Rodrigues AD, Gipson AE, Holsapple J, Toren P and Parkinson A (2006) Glucuronidation converts gemfibrozil to a potent, metabolism-dependent inhibitor of CYP2C8: implications for drug-drug interactions. *Drug Metab Dispos* **34**:191-197.

Panchagnula R, Kaur KJ, Singh I and Kaul CL (2000) Bioequivalence of rifampicin when administered as a fixed-dose combined formulation of four drugs versus separate formulations. *Methods Find Exp Clin Pharmacol* **22**:689-694.

Park JW, Siekmeier R, Lattke P, Merz M, Mix C, Schuler S and Jaross W (2001) Pharmacokinetics and pharmacodynamics of fluvastatin in heart transplant recipients taking cyclosporine A. *J Cardiovasc Pharmacol Ther* **6**:351-361.

Park JW, Siekmeier R, Merz M, Krell B, Harder S, Marz W, Seidel D, Schuler S and Gross W (2002) Pharmacokinetics of pravastatin in heart-transplant patients taking cyclosporin A. *Int J Clin Pharmacol Ther* **40**:439-450.

Plum A, Muller LK and Jansen JA (2000) The effects of selected drugs on the in vitro protein binding of repaglinide in human plasma. *Methods Find Exp Clin Pharmacol* **22**:139-143.

Prueksaritanont T, Chu X, Evers R, Klopfer S, Caro L, Kothare P, Dempsey C, Rasmussen S, Houle R and Chan G (2014) Pitavastatin is a more sensitive and selective OATP1B clinical probe than rosuvastatin. *Br J Clin Pharmacol*.

Ptachcinski RJ, Venkataramanan R, Rosenthal JT, Burckart GJ, Taylor RJ and Hakala TR (1985) Cyclosporine kinetics in renal transplantation. *Clin Pharmacol Ther* **38**:296-300.

Rydberg T, Jonsson A and Melander A (1995) Comparison of the kinetics of glyburide and its active metabolites in humans. *J Clin Pharm Ther* **20**:283-295.

Schneck DW, Birmingham BK, Zalikowski JA, Mitchell PD, Wang Y, Martin PD, Lasseter KC, Brown CD, Windass AS and Raza A (2004) The effect of gemfibrozil on the pharmacokinetics of rosuvastatin. *Clin Pharmacol Ther* **75**:455-463.

Shen H, Yang Z, Mintier G, Han YH, Chen C, Balimane P, Jemal M, Zhao W, Zhang R, Kallipatti S, Selvam S, Sukrutharaj S, Krishnamurthy P, Marathe P and Rodrigues AD (2013) Cynomolgus monkey as a potential model to assess drug interactions involving hepatic organic anion transporting polypeptides: in vitro, in vivo, and in vitro-to-in vivo extrapolation. *J Pharmacol Exp Ther* **344**:673-685.

Simonson SG, Raza A, Martin PD, Mitchell PD, Jarcho JA, Brown CD, Windass AS and Schneck DW (2004) Rosuvastatin pharmacokinetics in heart transplant recipients administered an antirejection regimen including cyclosporine. *Clin Pharmacol Ther* **76**:167-177.

Singhvi SM, Pan HY, Morrison RA and Willard DA (1990) Disposition of pravastatin sodium, a tissue-selective HMG-CoA reductase inhibitor, in healthy subjects. *Br J Clin Pharmacol* **29**:239-243.

Tang F, Horie K and Borchardt RT (2002) Are MDCK cells transfected with the human MRP2 gene a good model of the human intestinal mucosa? *Pharm Res* **19**:773-779.

Tse FL, Nickerson DF and Yardley WS (1993) Binding of fluvastatin to blood cells and plasma proteins. *J Pharm Sci* **82**:942-947.

USFDA (2012) Drug interaction studies - study design, data analysis, implications for dosing, and labeling recommendations. *Center for Drug Evaluation and Research (CDER)*.

van Giersbergen PL, Treiber A, Schneiter R, Dietrich H and Dingemanse J (2007) Inhibitory and inductive effects of rifampin on the pharmacokinetics of bosentan in healthy subjects. *Clin Pharmacol Ther* **81**:414-419.

VandenBrink BM, Foti RS, Rock DA, Wienkers LC and Wahlstrom JL (2011) Evaluation of CYP2C8 inhibition in vitro: utility of montelukast as a selective CYP2C8 probe substrate. *Drug Metab Dispos* **39**:1546-1554.

Varma MV, Lai Y, Feng B, Litchfield J, Goosen TC and Bergman A (2012) Physiologically based modeling of pravastatin transporter-mediated hepatobiliary disposition and drug-drug interactions. *Pharm Res* **29**:2860-2873.

Varma MV, Lai Y, Kimoto E, Goosen TC, El-Kattan AF and Kumar V (2013a) Mechanistic modeling to predict the transporter- and enzyme-mediated drug-drug interactions of repaglinide. *Pharm Res* **30**:1188-1199.

Varma MV, Lin J, Bi YA, Rotter CJ, Fahmi OA, Lam JL, El-Kattan AF, Goosen TC and Lai Y (2013b) Quantitative prediction of repaglinide-rifampicin complex drug interactions using dynamic and static mechanistic models: delineating differential CYP3A4 induction and OATP1B1 inhibition potential of rifampicin. *Drug Metab Dispos* **41**:966-974.

Varma MV, Obach RS, Rotter C, Miller HR, Chang G, Steyn SJ, El-Kattan A and Troutman MD (2010) Physicochemical space for optimum oral bioavailability: contribution of human intestinal absorption and first-pass elimination. *J Med Chem* **53**:1098-1108.

Varma MV, Scialis RJ, Lin J, Bi YA, Rotter CJ, Goosen TC and Yang X (2014) Mechanism-Based Pharmacokinetic Modeling to Evaluate Transporter-Enzyme Interplay in Drug Interactions and Pharmacogenetics of Glyburide. *AAPS J*.

Watanabe A, Nakamura K, Okudaira N, Okazaki O and Sudo K (2007) Risk assessment for drug-drug interaction caused by metabolism-based inhibition of CYP3A using automated in vitro assay systems and its application in the early drug discovery process. *Drug Metab Dispos* **35**:1232-1238.

Watanabe T, Kusuhara H, Maeda K, Shitara Y and Sugiyama Y (2009) Physiologically based pharmacokinetic modeling to predict transporter-mediated clearance and distribution of pravastatin in humans. *J Pharmacol Exp Ther* **328**:652-662.

Weber C, Schmitt R, Birnboeck H, Hopfgartner G, Eggers H, Meyer J, van Marle S, Viischer HW and Jonkman JH (1999) Multiple-dose pharmacokinetics, safety, and tolerability of bosentan, an endothelin receptor antagonist, in healthy male volunteers. *J Clin Pharmacol* **39**:703-714.

Weber C, Schmitt R, Birnboeck H, Hopfgartner G, van Marle SP, Peeters PA, Jonkman JH and Jones CR (1996) Pharmacokinetics and pharmacodynamics of the endothelin-receptor antagonist bosentan in healthy human subjects. *Clin Pharmacol Ther* **60**:124-137.

Xia CQ, Liu N, Miwa GT and Gan LS (2007) Interactions of cyclosporin a with breast cancer resistance protein. *Drug Metab Dispos* **35**:576-582.

Yago K, Kuroyama M, Motohashi S and Kumano K (1996) [Protein binding of clarithromycin in patients with chronic renal failure]. *Jpn J Antibiot* **49**:256-263.

Yoshida K, Maeda K and Sugiyama Y (2012) Transporter-mediated drug--drug interactions involving OATP substrates: predictions based on in vitro inhibition studies. *Clin Pharmacol Ther* **91**:1053-1064.

Zhang W, Deng S, Chen XP, Zhou G, Xie HT, He FY, Cao D, Li YJ and Zhou HH (2008) Pharmacokinetics of rosuvastatin when coadministered with rifampicin in healthy males: a randomized, single-blind, placebo-controlled, crossover study. *Clin Ther* **30**:1283-1289.

Zheng HX, Huang Y, Frassetto LA and Benet LZ (2009) Elucidating rifampin's inducing and inhibiting effects on glyburide pharmacokinetics and blood glucose in healthy volunteers: unmasking the differential effects of enzyme induction and transporter inhibition for a drug and its primary metabolite. *Clin Pharmacol Ther* **85**:78-85.
